# Supplementary material
Source: PubMed Central journal article supplement (PMC3100601)

## **The G Protein-Coupled Bile Acid Receptor, TGR5, Stimulates Gallbladder Filling**

Tingting Li, Sam R. Holmstrom, Serkan Kir, Michihisa Umetani, Daniel R. Schmidt,

Steven A. Kliewer, and David J. Mangelsdorf

### **Supplemental Figure Legends**

**Supplemental Figure 1.** *Cyp27a1* mRNA levels were measured by qPCR in liver from male WT and *Tgr5*<sup>-/-</sup> mice fed with chow or 0.2% cholic acid (CA) diet for 2 weeks (n = 4–5/group). All data are the mean ± SEM.

**Supplemental Figure 2.** Comparison of serum CCK concentrations. Serum was collected from both male WT and *Tgr5*<sup>-/-</sup> mice 30 minutes after intraperitoneal injection of INT-777 (60 mg/kg) or DMSO. CCK concentration was measured using an EIA kit (EK-069-04, Phoenix Inc) (n = 5–6/group). All data are the mean ± SEM.

**Supplemental Figure 3.** Intracellular cAMP concentration was measured in female mouse gallbladder tissue treated *ex vivo* with DMSO or LCA (10 μM) for 15 minutes. All data are the mean ± SEM. \**P* < 0.05.

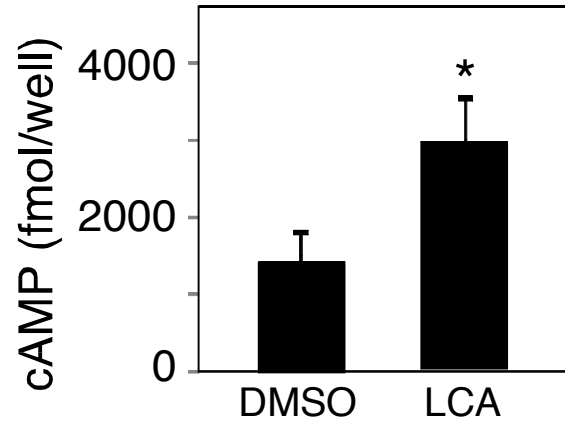

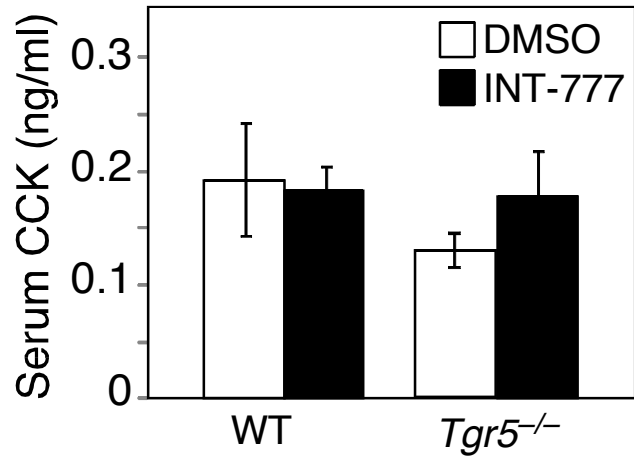

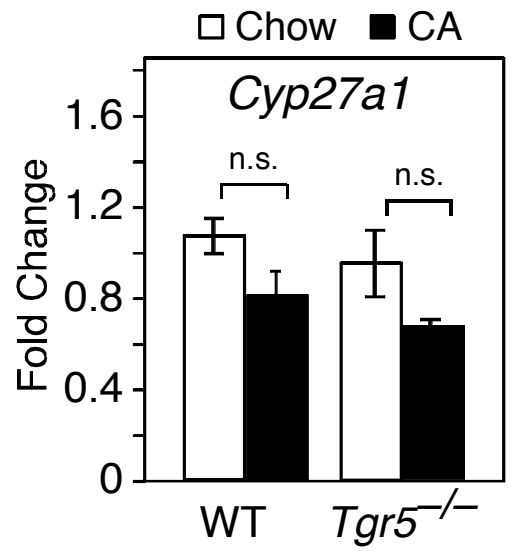

Supplement: supp_me.2010-0460_ME-10-0460_figs_1-3.pdf [file supp_me.2010-0460_ME-10-0460_figs_1-3.pdf]
